# Supplementary material for: Translational upregulation of Aurora-A by hnRNP Q1 contributes to cell proliferation and tumorigenesis in colorectal cancer
Source: PubMed Central journal article supplement (PMC5386382; doi:10.1038/cddis.2016.479), 2017-01-12

# Supplementary Figure S1

(A)

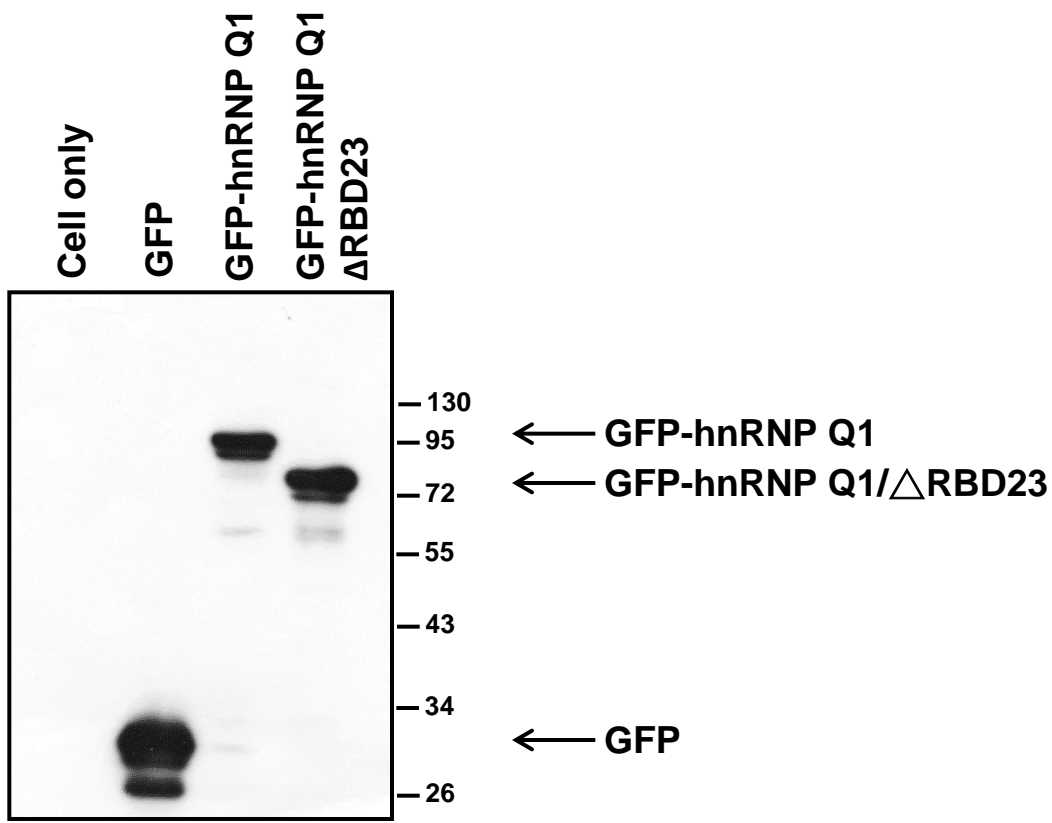

(B)

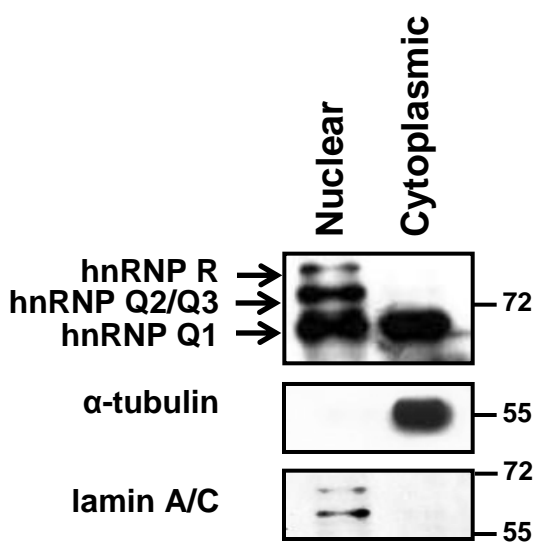

# Supplementary Figure S2

(A)

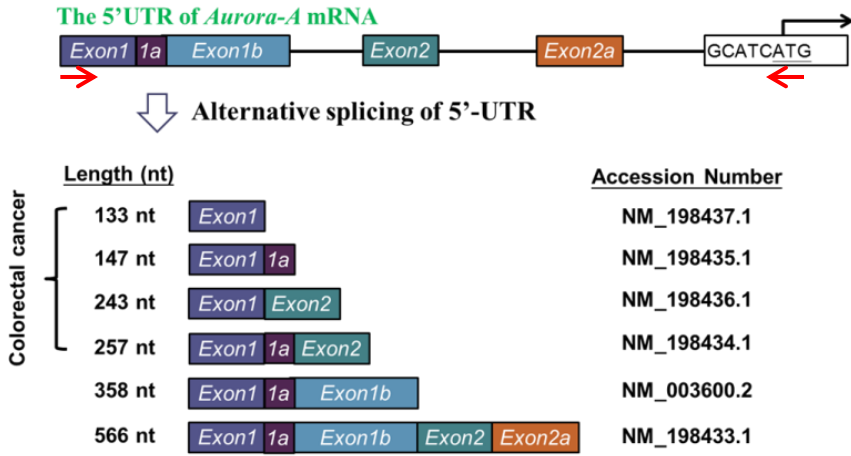

(B)

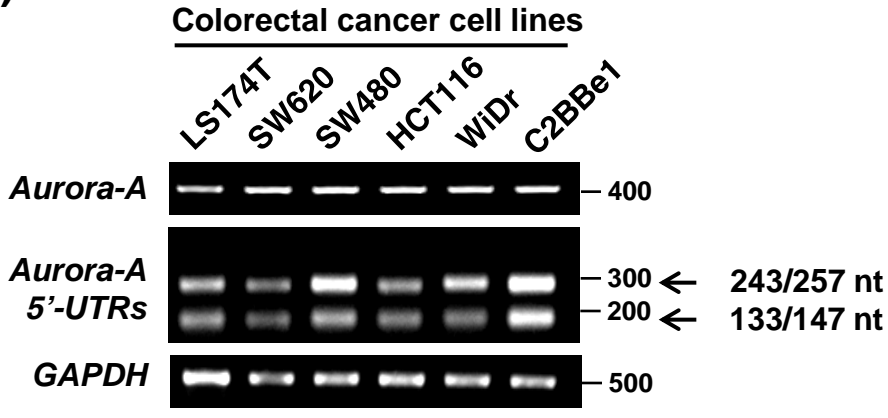

(C)

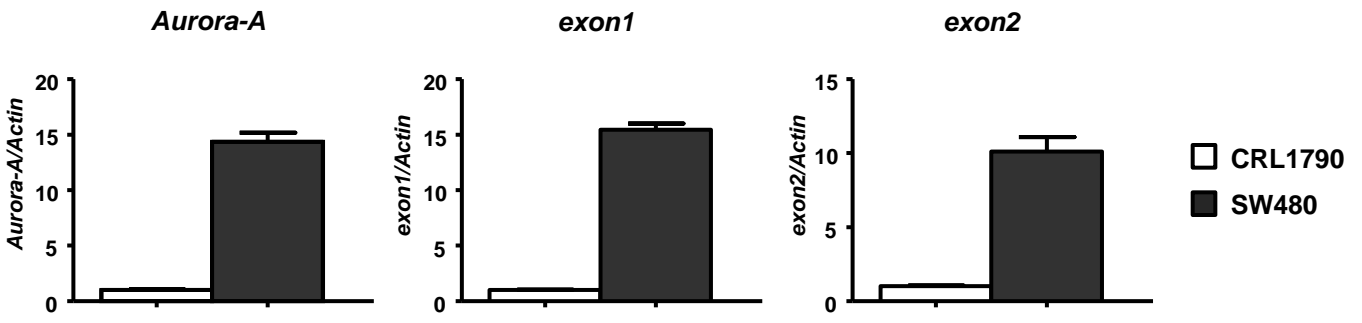

# Supplementary Figure S2

(D)

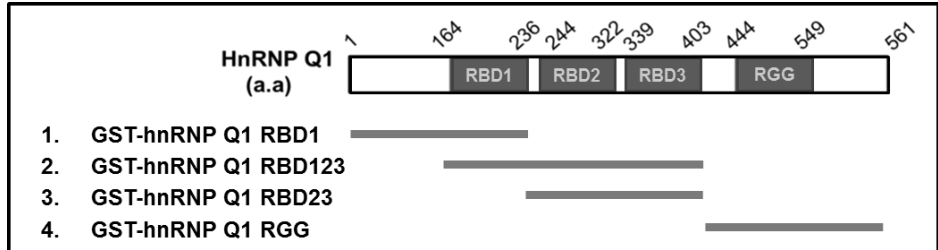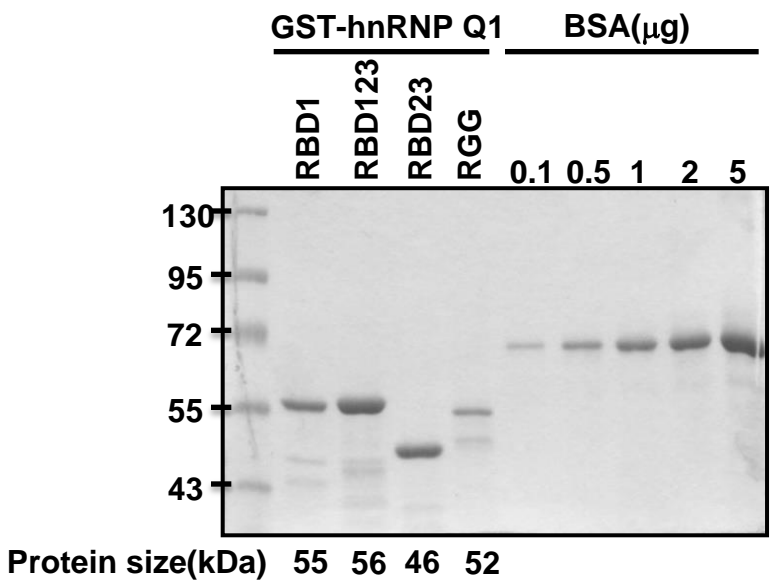

# Supplementary Figure S3

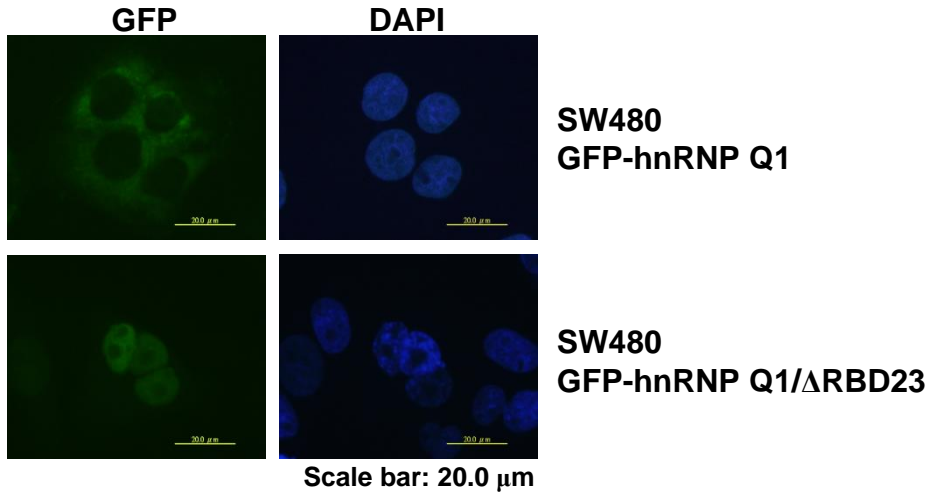

# Supplementary Figure S4

(A)

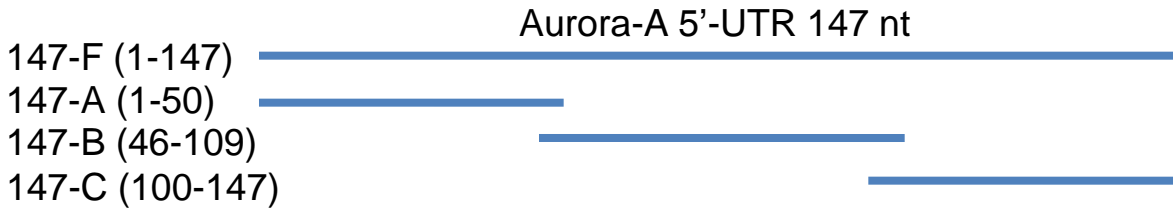

(B)

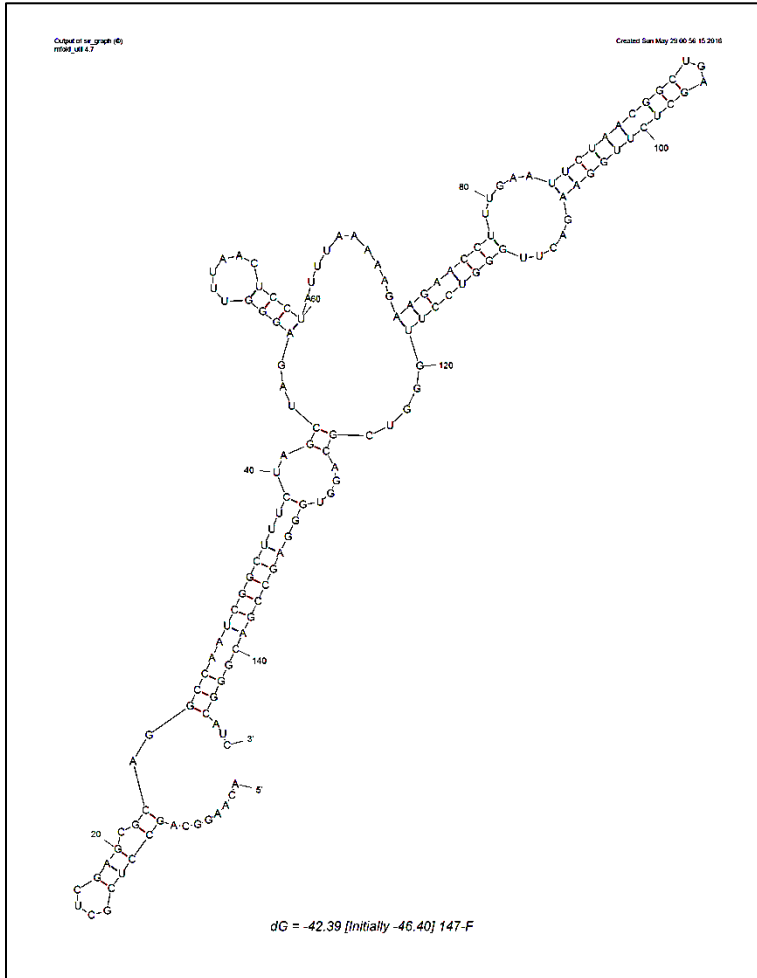

(C)

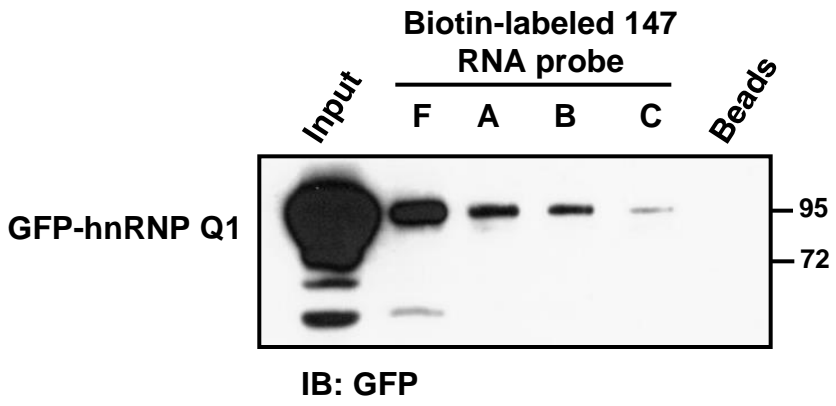

# Supplementary Figure S5

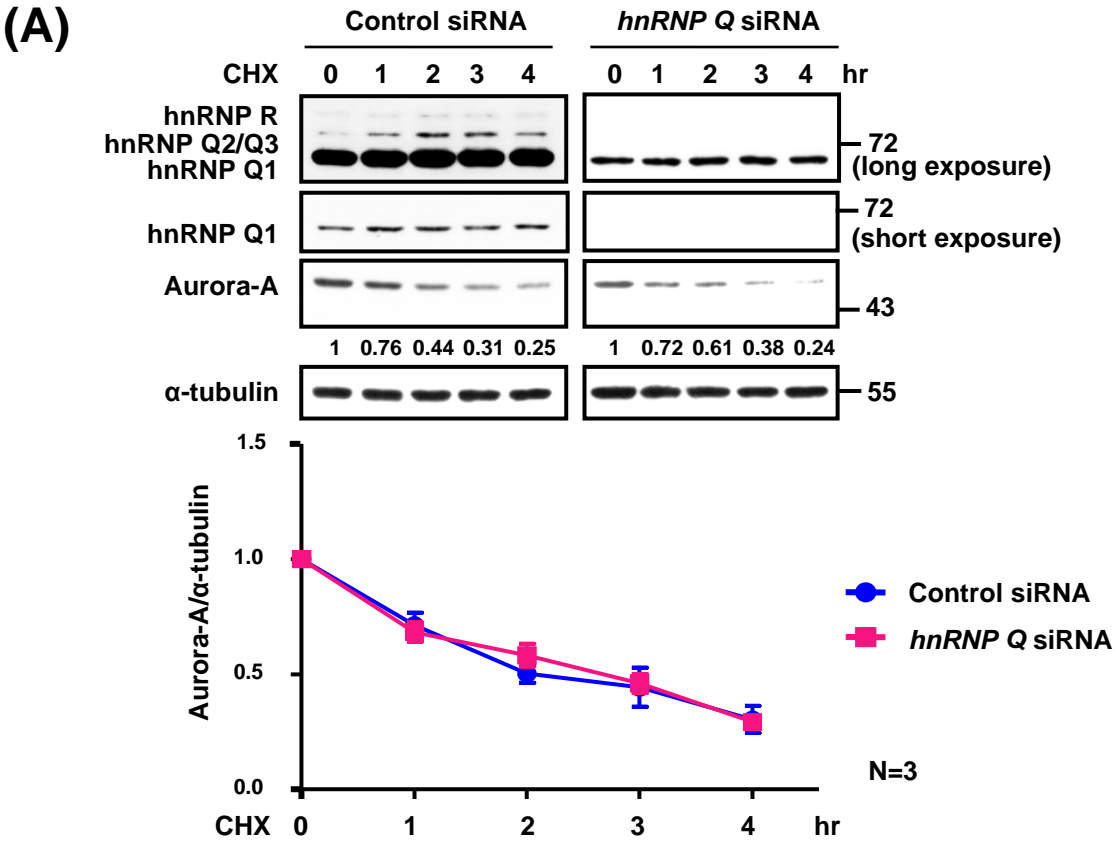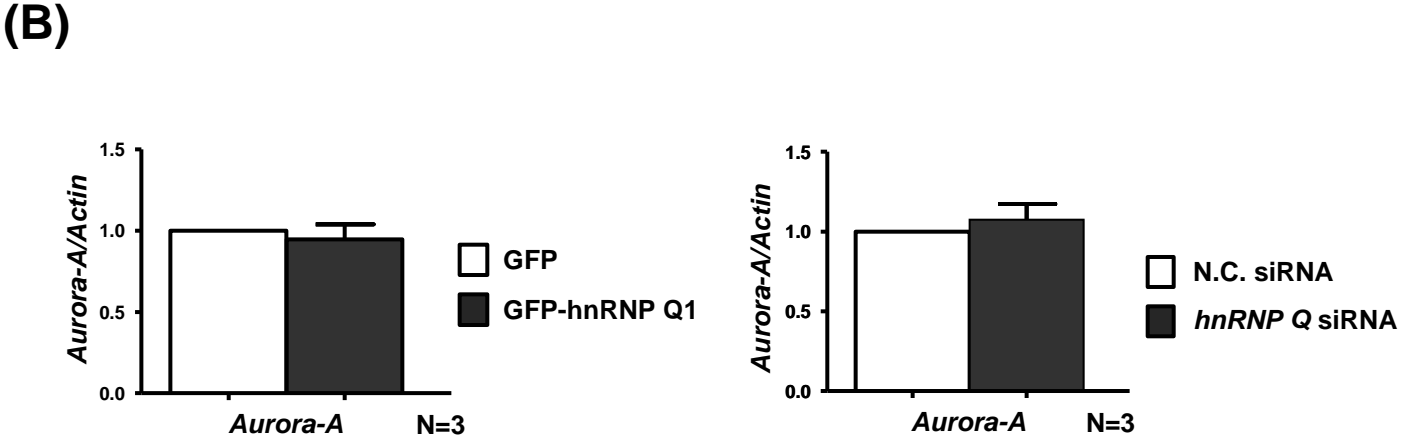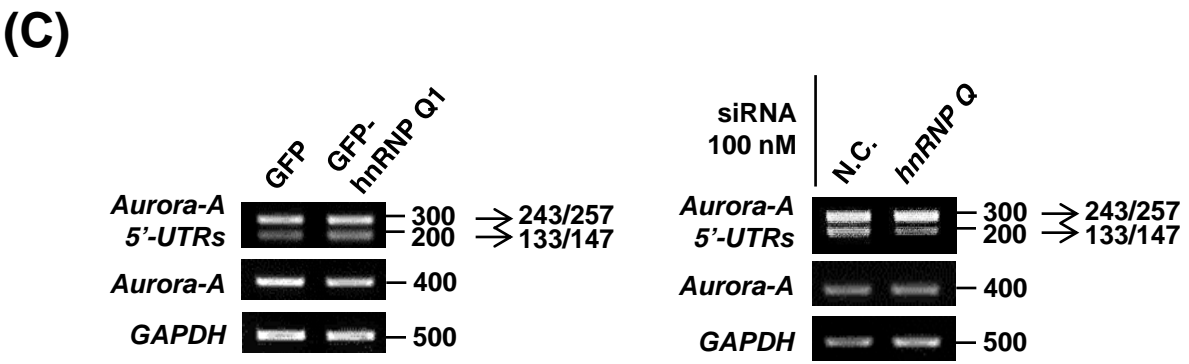

# Supplementary Figure S6

(A)

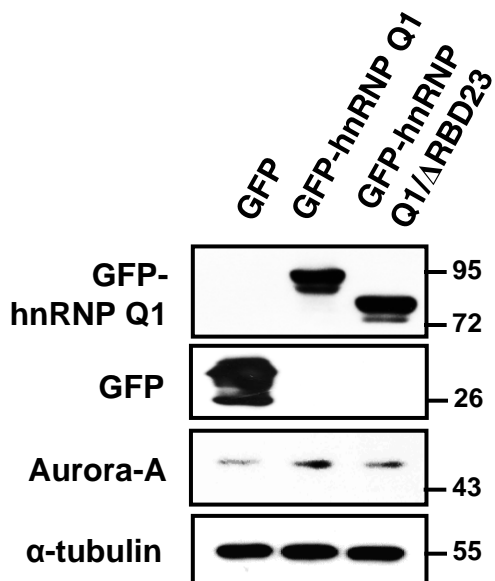

(B)

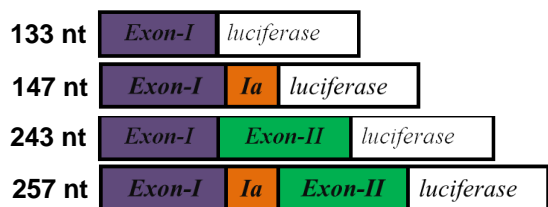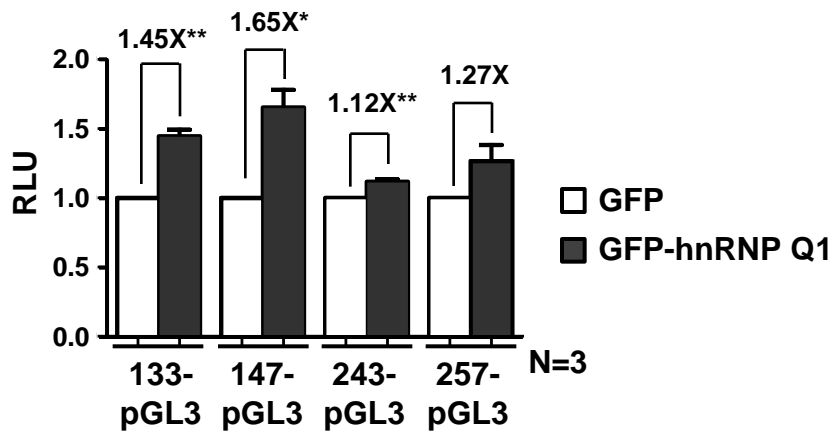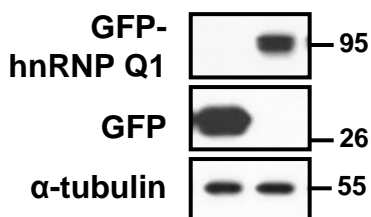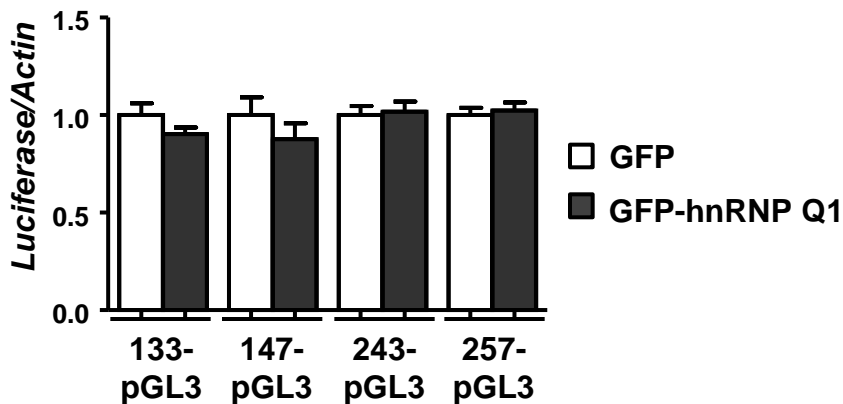

# Supplementary Figure S6

(C)

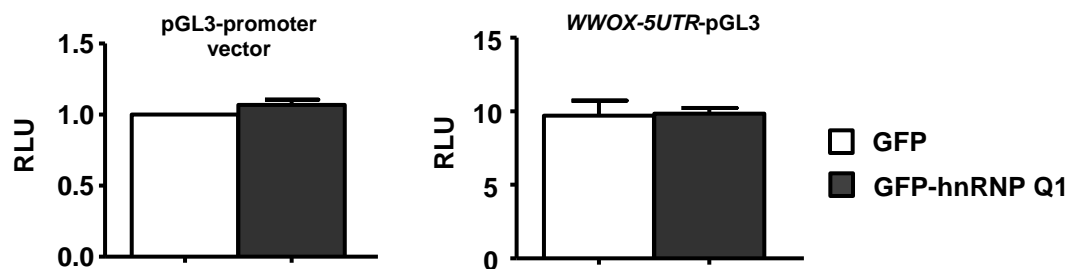

(D)

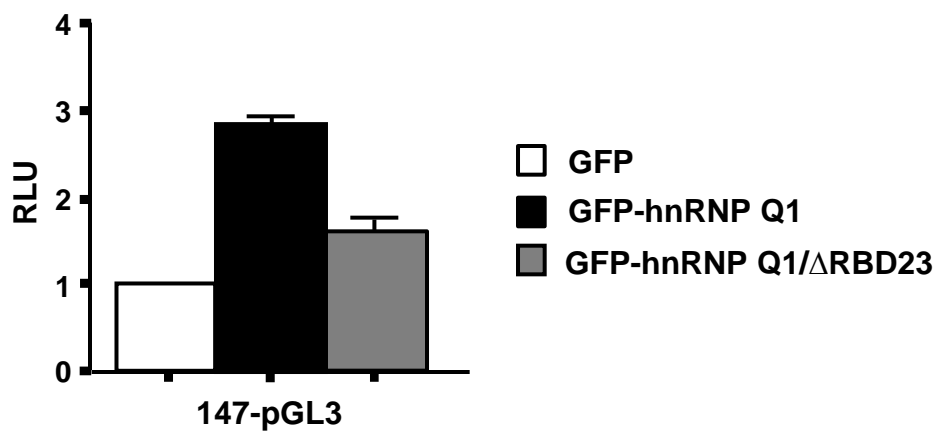

(E)

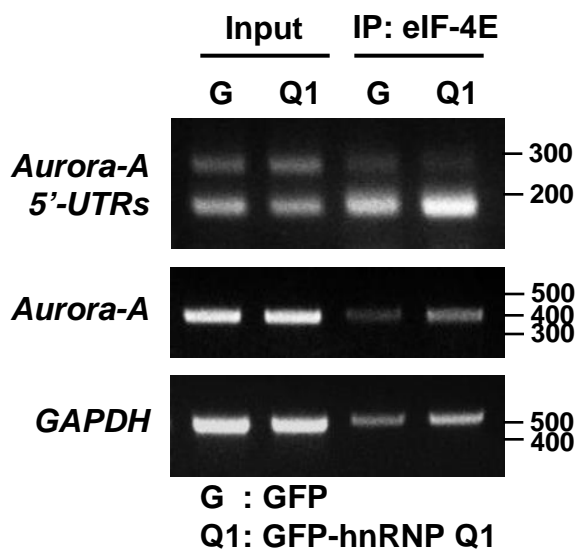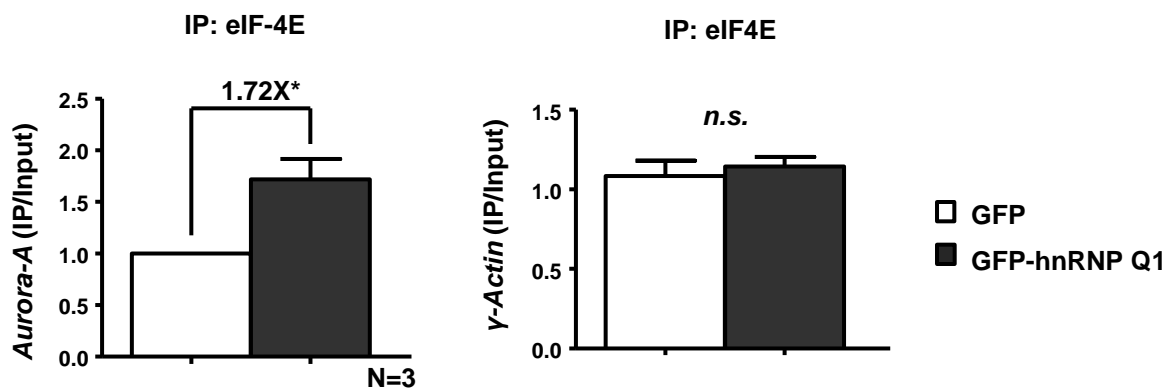



# Supplementary Figure S7

(A)

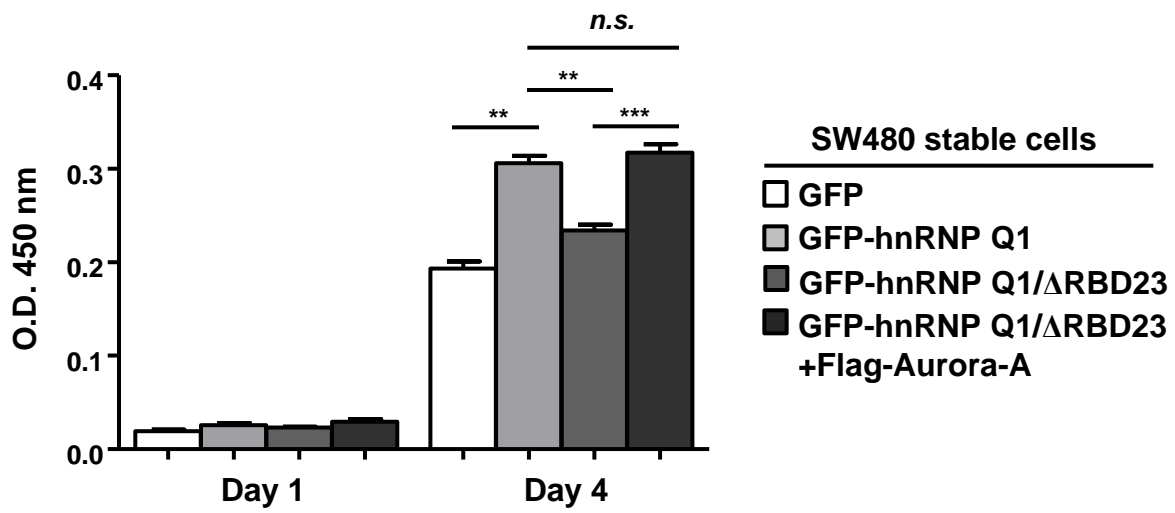

(B)

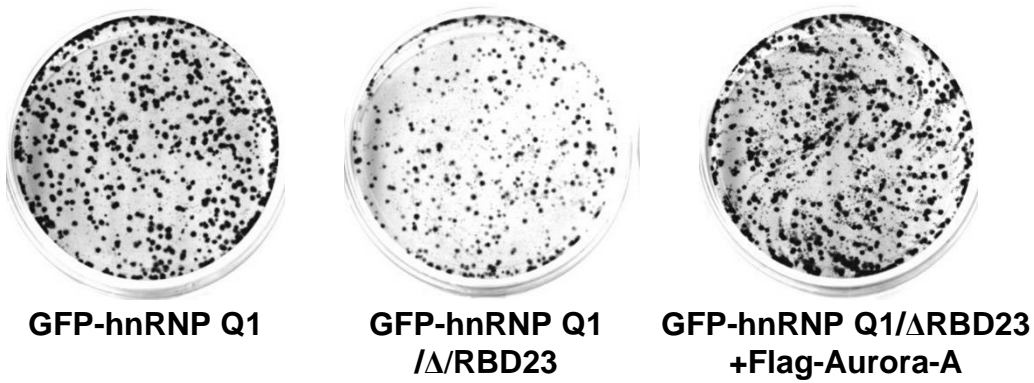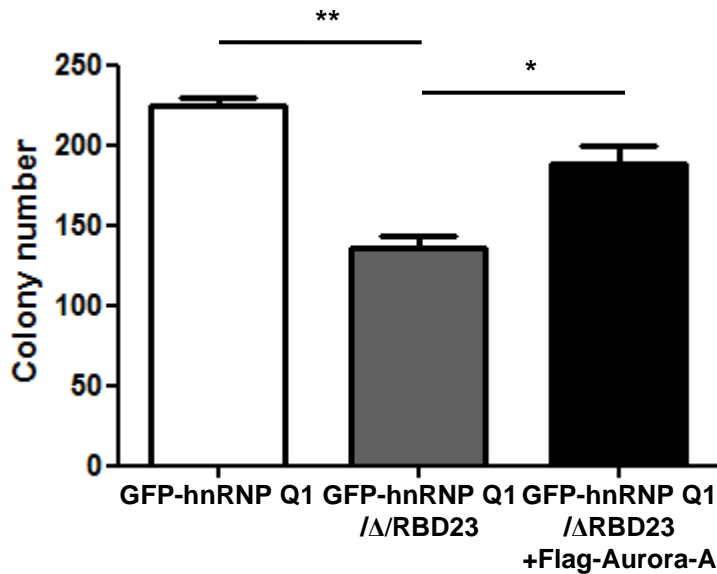

# Supplementary Figure S8

(A)

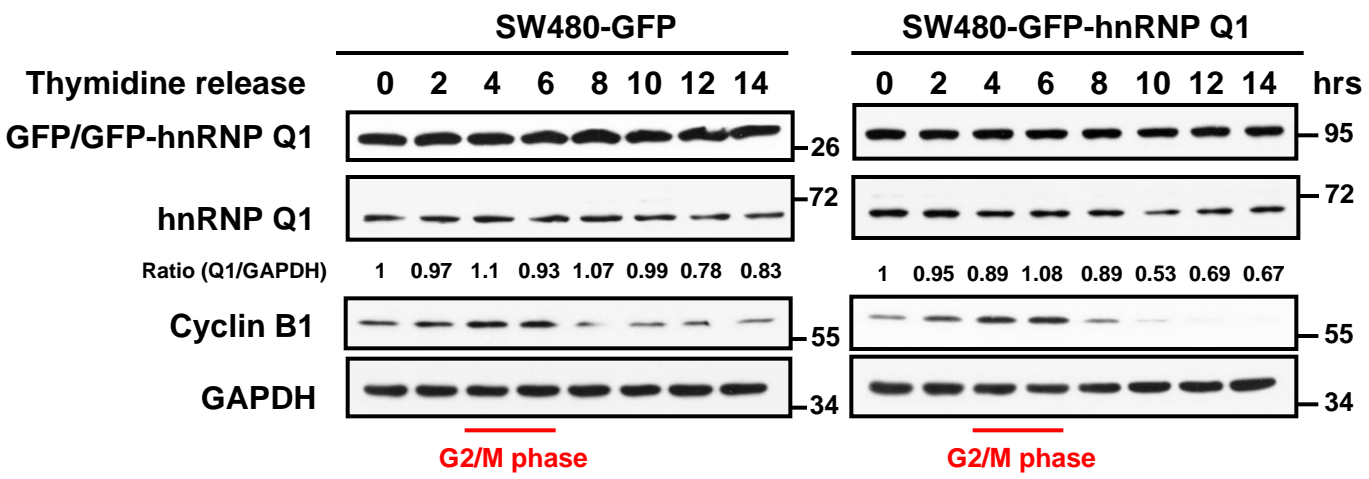

(B)

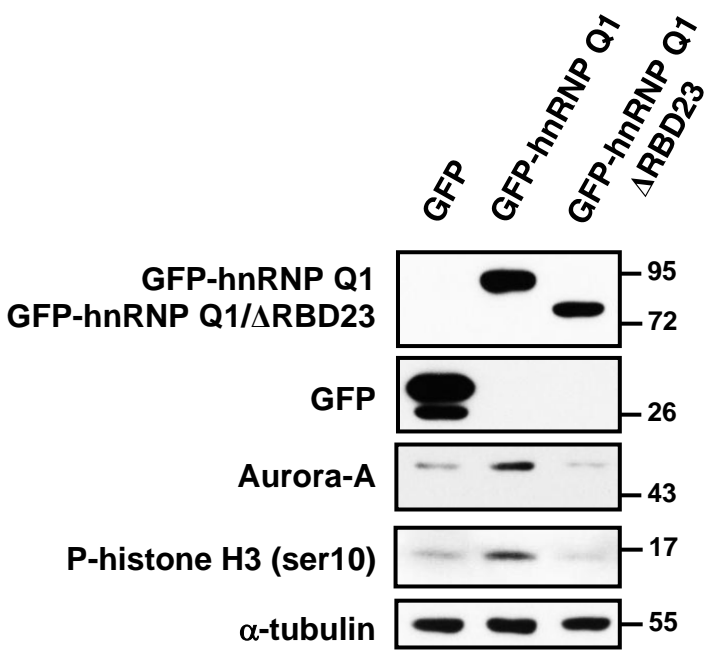

# Supplementary Figure S9

(A)

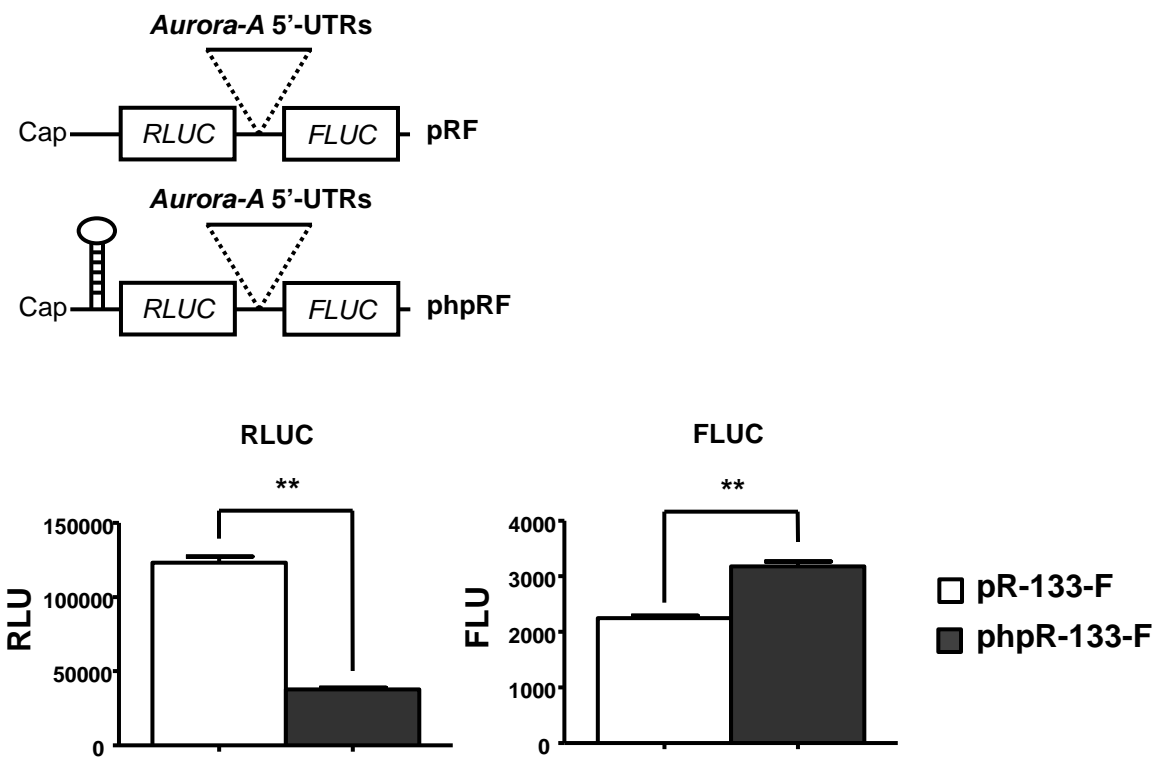

(B)

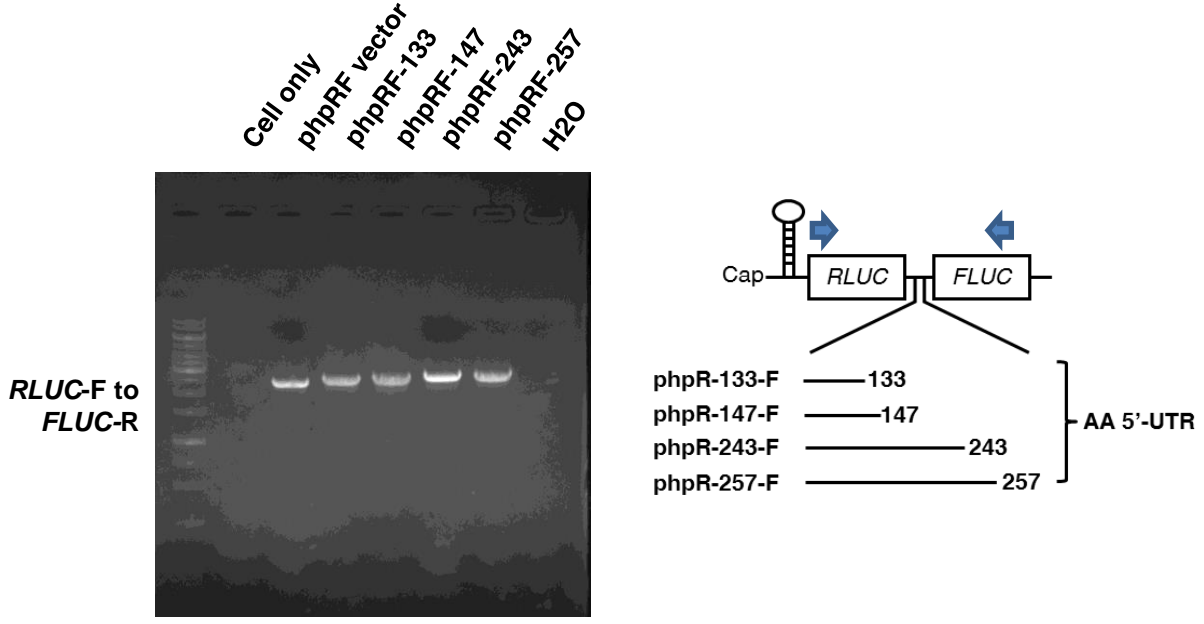

# Supplementary Figure S9

(C)

phpR-133-F

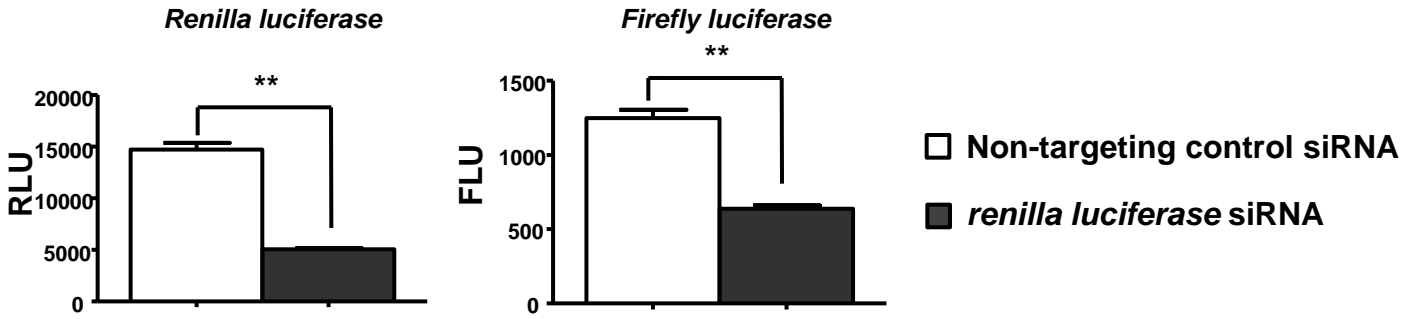

phpR-147-F

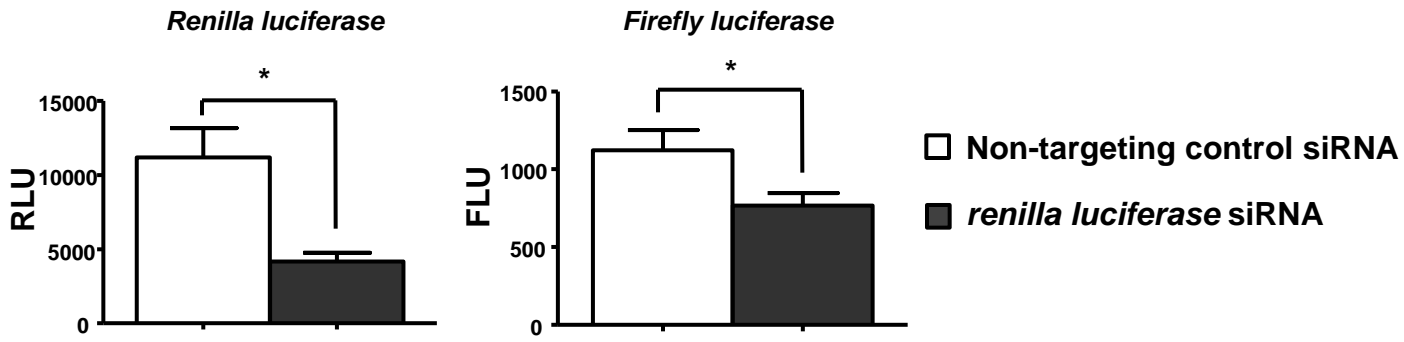

phpR-243-F

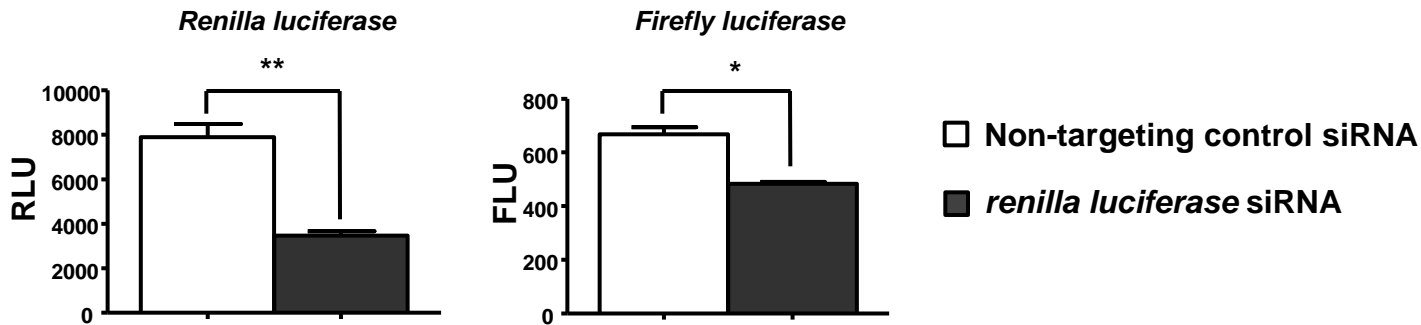

phpR-257-F

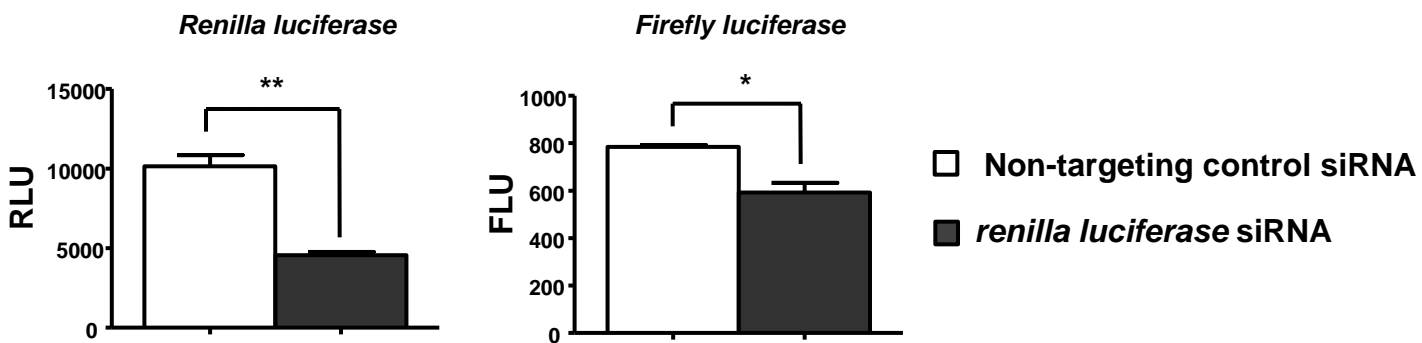

# Supplementary Figure S9

(D)

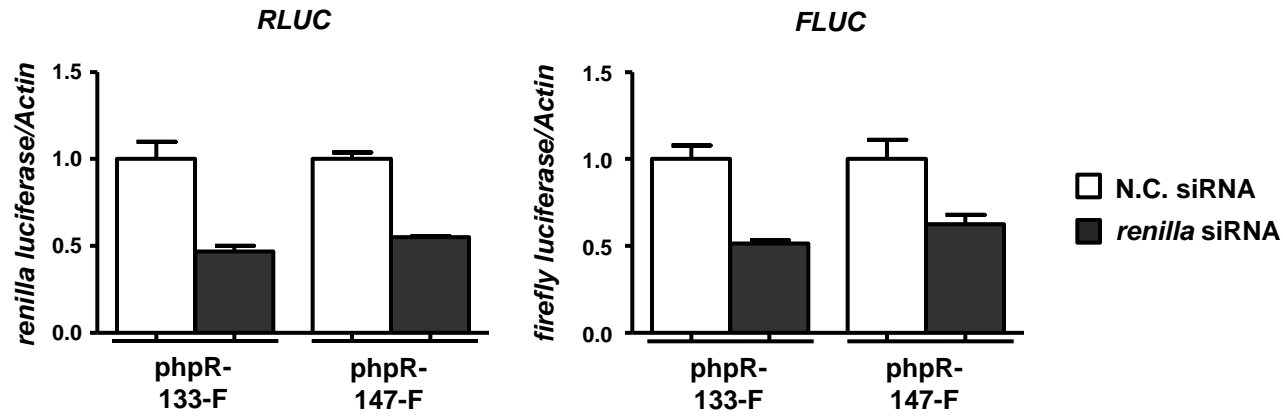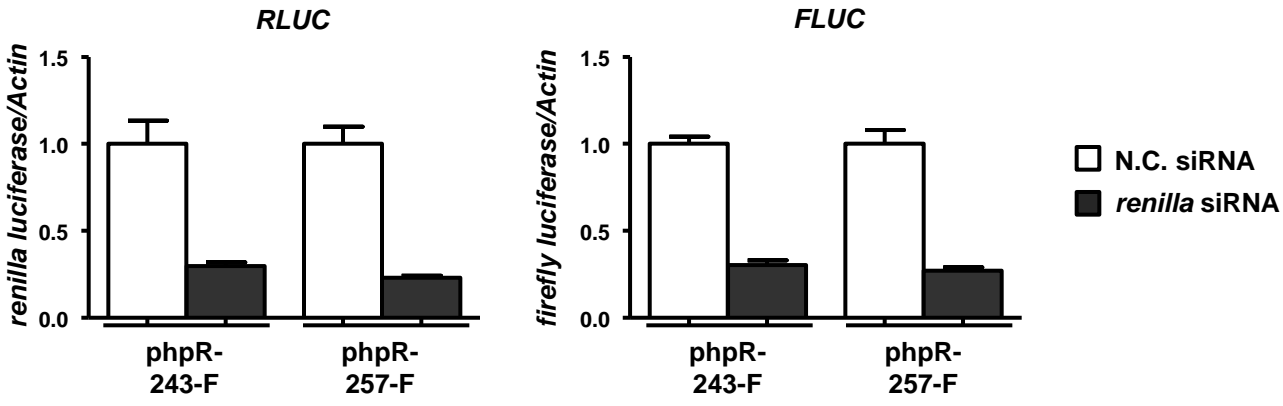

# Supplementary Figure S10

(A)

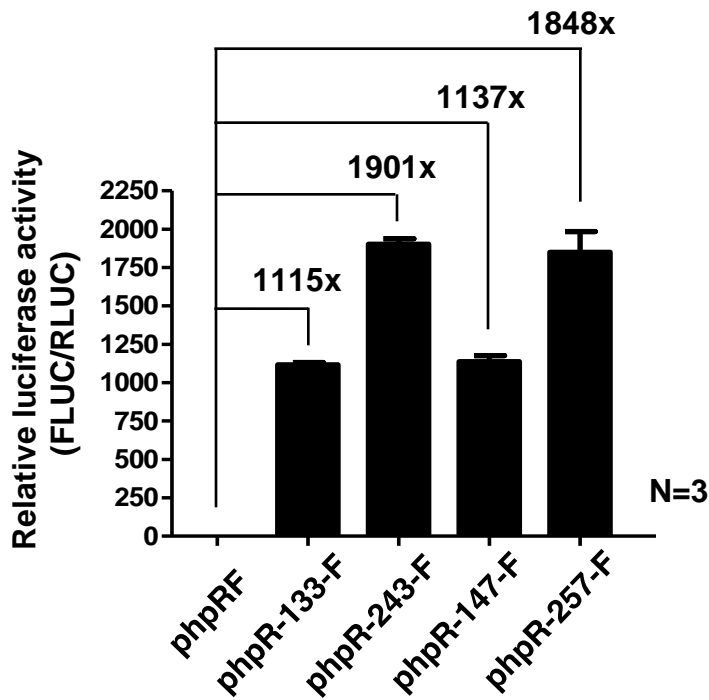

(B)

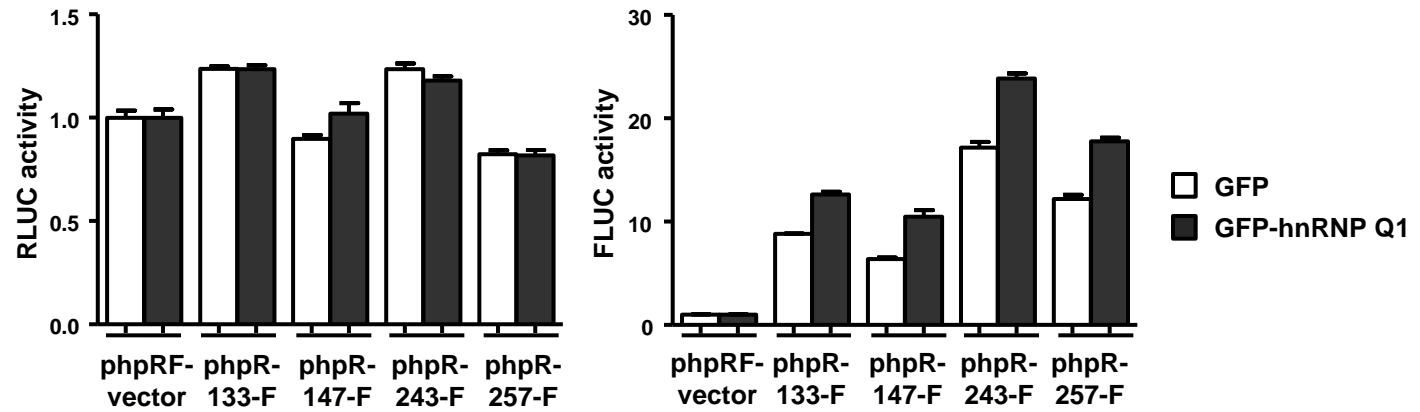

# Supplementary Figure S10

(C)

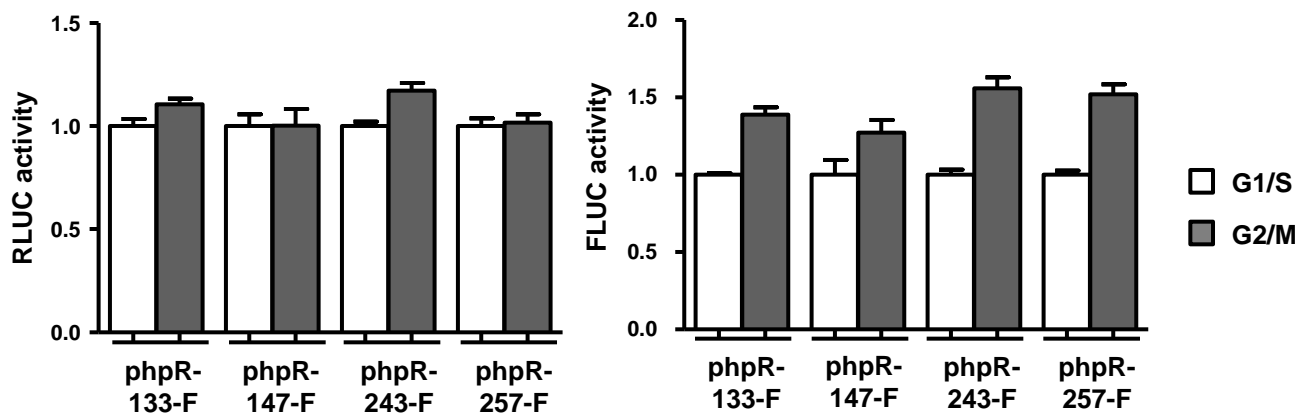

(D)

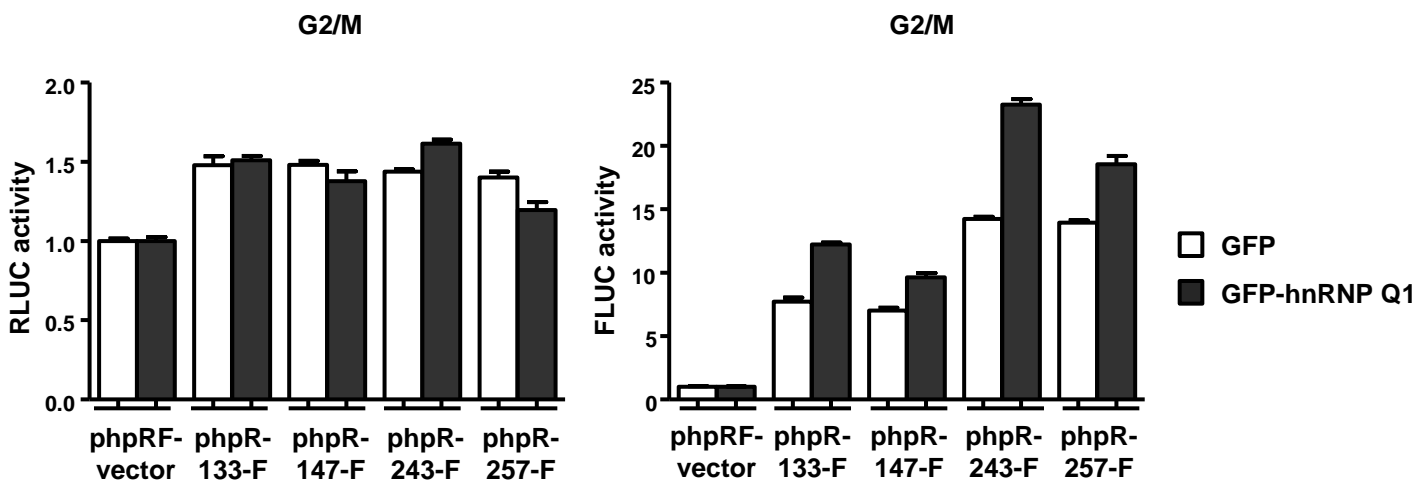

(E)

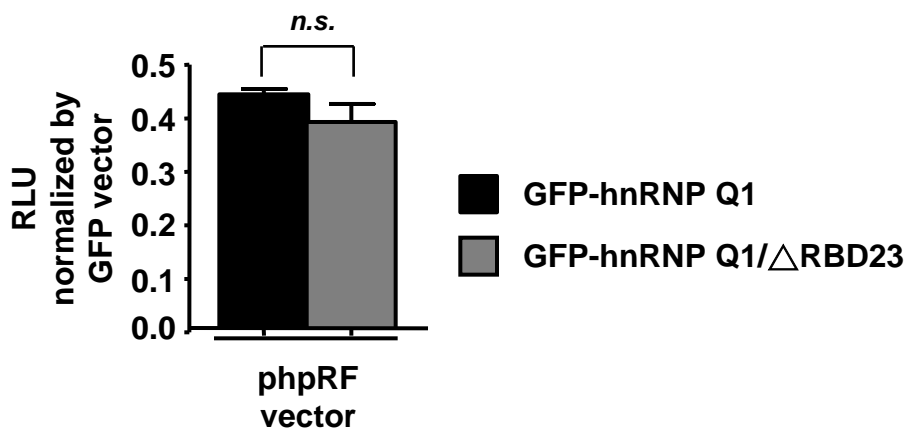

# Supplementary Figure S11

(A)

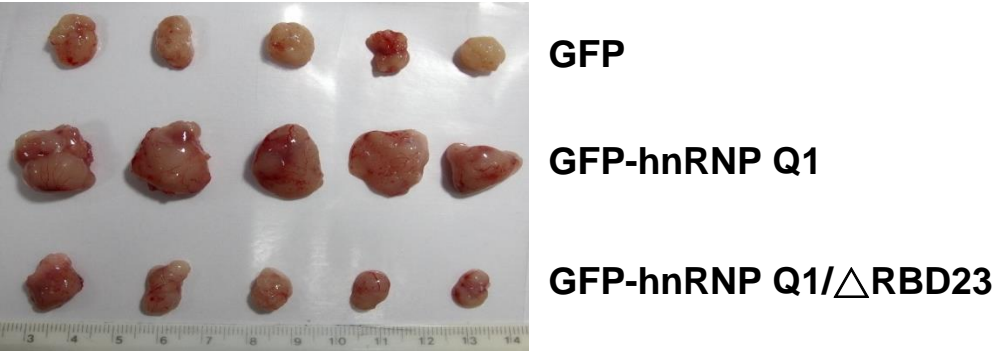

(B)

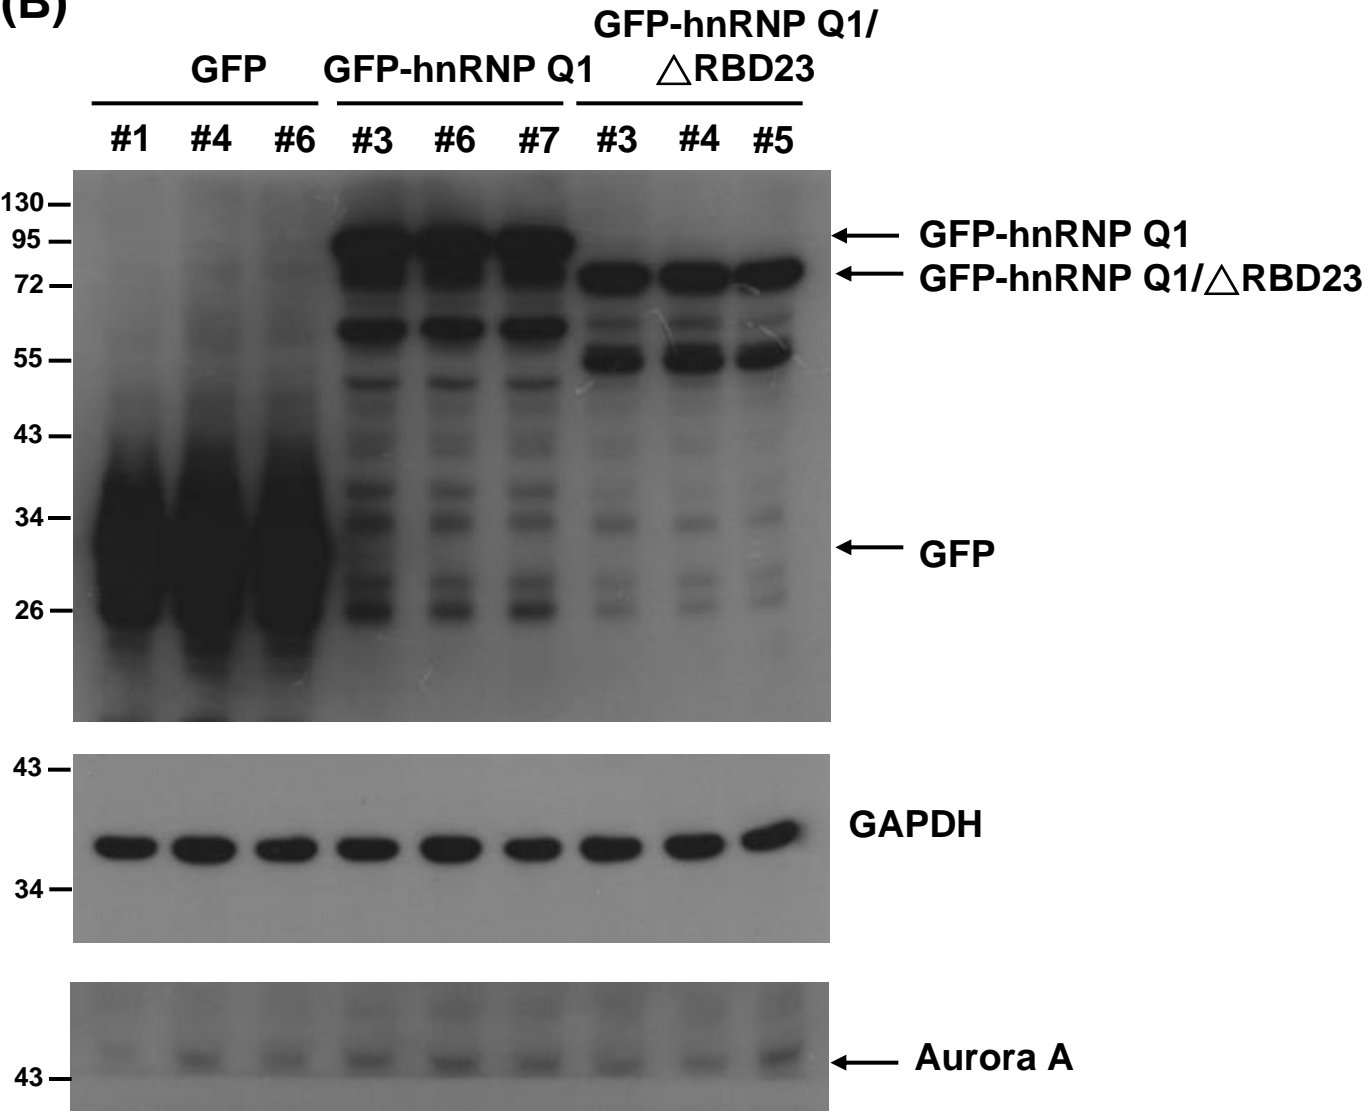

Supplement: cddis2016479x1.pdf [file cddis2016479x1.pdf]
